# Supplementary material
Source: PubMed Central journal article supplement (PMC3272329)
Supplement: NIHMS334048-supplement-Supplementary_Data.pdf [file NIHMS334048-supplement-Supplementary_Data.pdf]

Supplementary Table 1.

Regions found in exploratory whole-brain analyses (performed at threshold of  $p < .005$ , 10 voxels, uncorrected) to be more active during exclusion compared to inclusion in the TD group (A) and ASD group (B) separately, as well as in the between-group contrast directly comparing the TD group to the ASD group (i.e., TDs > ASDs).

| Region           | BA    | (A) TD group  |          |          | (B) ASD group |          |          | (C) TDs > ASDs |          |          |
|------------------|-------|---------------|----------|----------|---------------|----------|----------|----------------|----------|----------|
|                  |       | [x y z]       | <i>t</i> | <i>p</i> | [x y z]       | <i>t</i> | <i>p</i> | [x y z]        | <i>t</i> | <i>p</i> |
| subACC           | 11    | [0 36 -16]    | 4.73     | <.0001   | [6 33 -4]     | 4.08     | <.0005   |                |          |          |
| RAI              |       | [36 18 -24]   | 5.48     | <.0001   |               |          |          | [42 -15 12]    | 3.25     | <.005    |
| LAI              |       | [-45 15 -12]  | 4.34     | <.0005   | [-48 15 4]    | 3.45     | <.005    | [-45 12 -8]    | 3.57     | <.001    |
| RVL PFC          | 11/47 | [39 36 -16]   | 4.66     | <.0001   | [42 30 0]     | 3.85     | <.001    | [45 36 -12]    | 3.09     | <.005    |
|                  | 46    | [54 39 8]     | 5.14     | <.0001   | [57 30 12]    | 4.58     | <.0005   |                |          |          |
| LVL PFC          | 47    | [-42 27 -12]  | 4.12     | <.0005   |               |          |          |                |          |          |
| VS               |       | [6 3 4]       | 4.65     | <.0001   | [6 12 -4]     | 3.47     | <.005    | [21 3 -12]     | 3.60     | <.001    |
| Occipital Lobe   | 18/19 | [-3 -99 20]   | 6.24     | <.0001   | [33 -87 24]   | 6.28     | <.0001   | [36 -84 -12]   | 3.51     | <.001    |
| MTG              | 39    | [42 -63 24]   | 5.46     | <.0001   |               |          |          | [51 -18 -16]   | 3.05     | <.005    |
| MTG              | 21    | [-63 -33 0]   | 3.57     | <.005    | [-51 -24 -12] | 5.05     | <.0001   |                |          |          |
|                  |       | [63 -12 -12]  | 5.18     | <.0001   | [60 -3 -16]   | 4.04     | <.0005   |                |          |          |
| STG              | 22    |               |          |          |               |          |          | [57 -60 16]    | 3.46     | <.001    |
| STG              | 38    |               |          |          |               |          |          | [-36 6 -20]    | 3.55     | <.001    |
| Cerebellum       |       | [6 -57 -48]   | 4.11     | <.0005   | [-21 -81 -20] | 5.50     | <.0001   | [0 -42 4]      | 3.84     | <.0005   |
|                  |       | [30 -78 -32]  | 3.29     | <.005    | [15 -84 -16]  | 3.84     | <.001    | [21 -54 -12]   | 3.92     | <.0005   |
| MPPC             | 7/31  | [3 -42 40]    | 5.09     | <.0001   | [-9 -51 48]   | 4.39     | <.0005   | [6 -42 44]     | 6.09     | <.0001   |
|                  |       |               |          |          |               |          |          | [33 -81 44]    | 2.97     | <.005    |
| Amygdala         |       | [21 3 -12]    | 3.32     | <.005    |               |          |          | [27 -3 -8]     | 3.47     | <.001    |
| DMPFC            | 9     | [0 60 36]     | 6.54     | <.0001   |               |          |          |                |          |          |
| Parahippo. Gyrus | 35    | [-18 -21 -12] | 4.19     | <.0005   |               |          |          |                |          |          |
| Parahippo. Gyrus | 28    | [24 -18 -8]   | 4.17     | <.0005   |               |          |          |                |          |          |
| ITG              | 20    | [-60 -30 -20] | 4.06     | <.0005   |               |          |          |                |          |          |

|                   |      |             |      |       |              |            |
|-------------------|------|-------------|------|-------|--------------|------------|
| DLPFC             | 6    | [42 0 52]   | 3.53 | <.005 |              |            |
| DLPFC             | 9    | [-48 18 20] | 3.43 | <.005 |              |            |
| dACC              | 24   |             |      |       | [0 24 20]    | 3.34 <.005 |
| dACC              | 6/24 |             |      |       | [3 0 48]     | 2.92 <.005 |
| Postcentral Gyrus | 40   |             |      |       | [-60 -18 16] | 3.10 <.005 |

---

*Note.* [x y z] refers to MNI coordinates in the left-right, anterior-posterior, and interior-superior dimensions, respectively; *t* refers to the t-score at those coordinates (local maxima); *p* refers to the level of significance that each cluster met. The between-group comparison controlled for IQ. There were no clusters in which the ASD group showed significantly greater activity than the TD group. The following abbreviations are used for the names of specific regions: subgenual anterior cingulate cortex (subACC), right anterior insula (RAI), left anterior insula (LAI), right ventrolateral prefrontal cortex (RVL PFC), left ventrolateral prefrontal cortex (LVL PFC), ventral striatum (VS), middle temporal gyrus (MTG), superior temporal gyrus (STG), medial posterior parietal cortex (MPPC), dorsomedial prefrontal cortex (DMPFC), parahippocampal (Parahippo.), inferior temporal gyrus (ITG), dorsolateral prefrontal cortex (DLPFC), and dorsal anterior cingulate cortex (dACC).
